# Supplementary material for: Surfactant effect on and luminescence tuning of lanthanide-doped ScPO4·2H2O microparticles
Source: Royal Society of Chemistry journal article supplement (doi:10.1039/c5tc03051j), 2015-01-01
Supplement: c5tc03051j1.pdf [file c5tc03051j1.pdf]

## SUPPORTING INFORMATION

### Surfactant Effect on and Luminescence Tuning of Lanthanide-Doped $\text{ScPO}_4 \cdot 2\text{H}_2\text{O}$ Microparticles

Hongjin Chang<sup>a</sup>, Yongsheng Zhu<sup>c</sup>, Juan Xie<sup>b</sup>, Hongyu Li<sup>a</sup>, Botong Liu<sup>a</sup>, Shuilin Xu<sup>a</sup>, Xiaoji Xie<sup>a,\*</sup>, Ling Huang<sup>a,\*</sup> and Wei Huang<sup>a,b,\*</sup>

<sup>a</sup>Key Laboratory of Flexible Electronics (KLOFE) & Institute of Advanced Materials (IAM), Jiangsu National Synergistic Innovation Center for Advanced Materials (SICAM), Nanjing Tech University (NanjingTech), 30 South Puzhu Road, Nanjing 211816, China

<sup>b</sup>Key Laboratory for Organic Electronics and Information Displays & Institute of Advanced Materials (IAM), Jiangsu National Synergistic Innovation Center for Advanced Materials (SICAM), Nanjing University of Posts & Telecommunications, 9 Wenyuan Road, Nanjing 210023, China

<sup>c</sup>Physics and Electronic Engineering College, Nanyang Normal University, Nanyang 473061, China

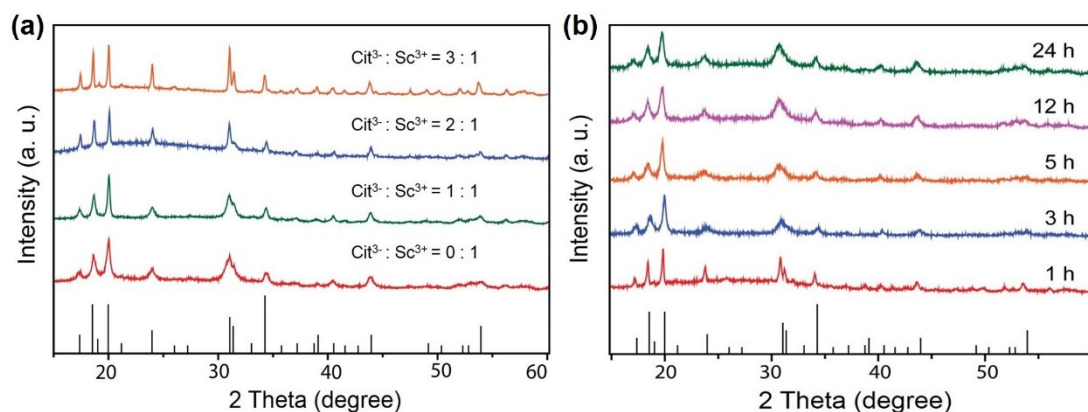

**Fig. S1** (a) XRD patterns of  $\text{ScPO}_4 \cdot 2\text{H}_2\text{O}$  microparticles obtained at various  $\text{Cit}^{3+}:\text{Sc}^{3+}$  molar ratios; (b) XRD patterns of the  $\text{ScPO}_4 \cdot 2\text{H}_2\text{O}$  microparticles synthesized at 180 °C for 1 h, 3 h, 5 h, 12 h, and 24 h, respectively. The diffraction patterns at the bottom is the literature reference of monoclinic  $\text{ScPO}_4 \cdot 2\text{H}_2\text{O}$  crystal (Joint Committee on Powder Diffraction Standards file number 38-0431).

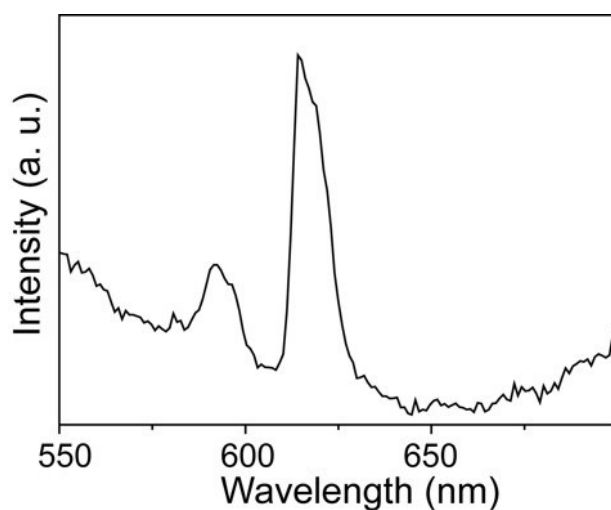

**Fig. S2** Room temperature luminescence emission of  $\text{ScPO}_4 \cdot 2\text{H}_2\text{O}:\text{Ce},\text{Eu}(4\%,12\%)$  microspheres under 260 nm excitation.

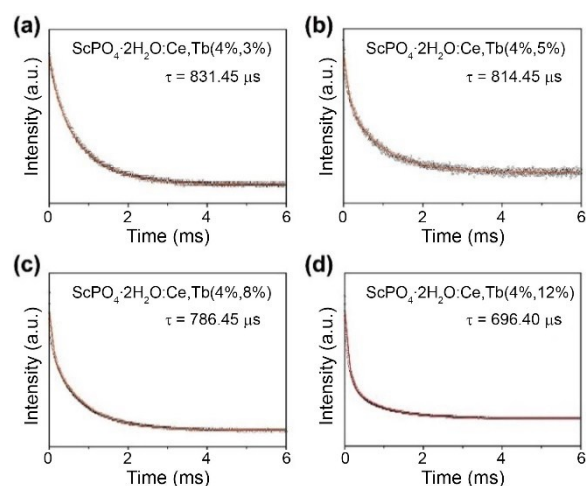

**Fig. S3** Decay curves of 550 nm emission of  $\text{ScPO}_4 \cdot 2\text{H}_2\text{O} : 4\% \text{Ce}, (x\%) \text{Tb}$  microparticles at  $x\%$  values of: (a) 3%, (b) 5%, (c) 8%, and (d) 12%.

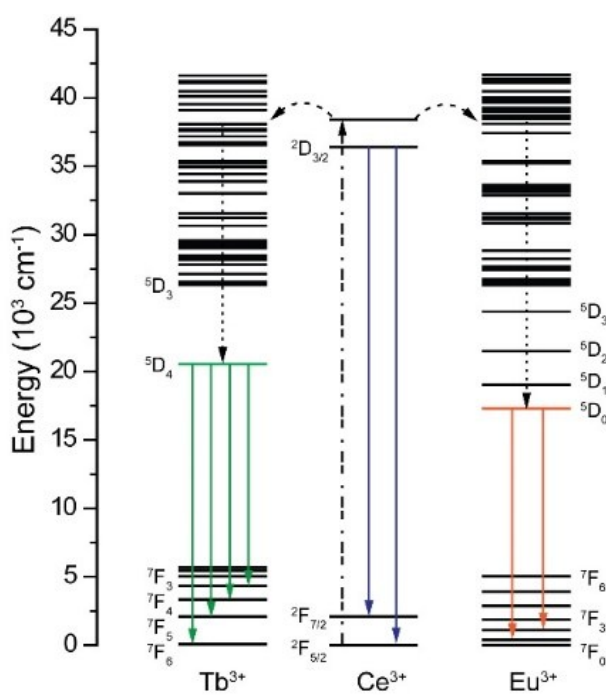

**Fig. S4** Proposed energy transfer mechanism of  $\text{ScPO}_4 \cdot 2\text{H}_2\text{O}$  microparticles co-doped with  $\text{Ce}^{3+}, \text{Tb}^{3+}$  or  $\text{Ce}^{3+}, \text{Eu}^{3+}$  under UV excitation. The dashed-dotted, dashed, dotted, and full arrows represent photon excitation, energy transfer, relaxation and emission process, respectively.

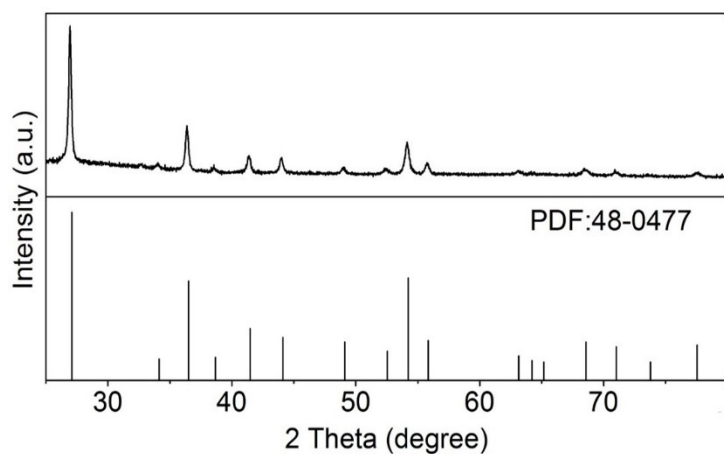

**Fig. S5** XRD patterns of the  $\text{ScPO}_4$  microspheres after annealing at 800 °C under  $\text{N}_2$  atmospheres.

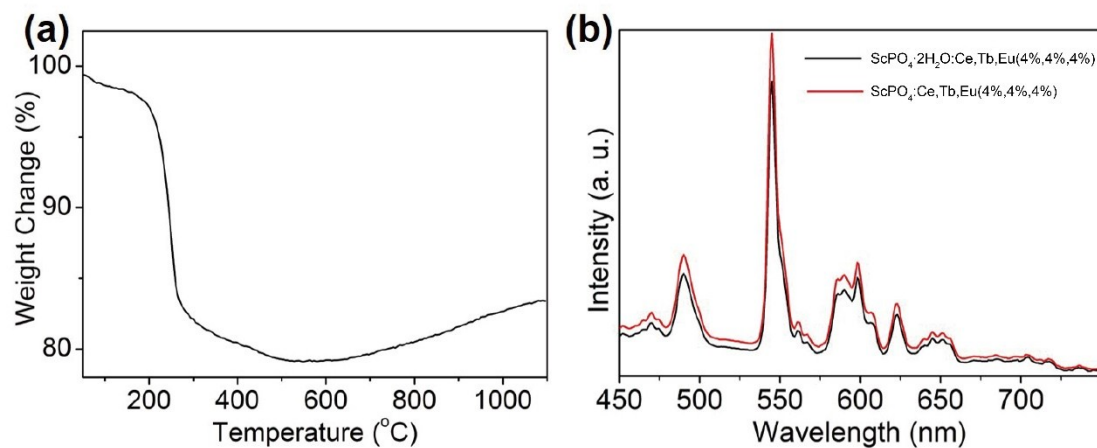

**Fig. S6** (a) Thermogravimetric analysis of the  $\text{ScPO}_4 \cdot 2\text{H}_2\text{O}:\text{Ce},\text{Tb},\text{Eu}(4\%,4\%,4\%)$  microspheres under  $\text{N}_2$  atmosphere. (b) the corresponding room temperature emission (under 260 nm excitation) of the  $\text{ScPO}_4:\text{Ce},\text{Tb},\text{Eu}(4\%,4\%,4\%)$  microspheres, after annealing.

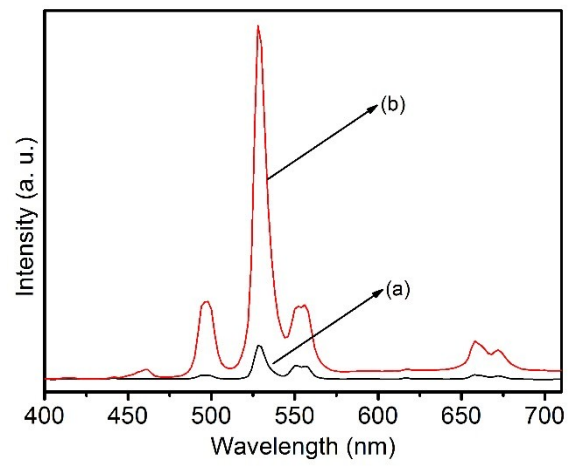

**Fig. S7** Upconversion emission of (a) ScPO<sub>4</sub>·2H<sub>2</sub>O:Yb/Er and (b) ScPO<sub>4</sub>:Yb/Er microparticles, excited by 980 nm laser.
